# Supplementary material for: Transcriptional regulation of Sis1 promotes fitness but not feedback in the heat shock response
Source: eLife. 2023 May 9;12:e79444. doi: 10.7554/eLife.79444 (PMC10191621; doi:10.7554/eLife.79444)
Supplement: Supplementary file 1. — Associated with all figures. [file elife-79444-supp1.xlsx]

## Sheet: Sheet2
TABLE S1 - yeast strains
Strain	Genotype	Description	Figure
DPY1701	w303a; 4xHSE-Venus::LEU;Sup35pr-SIS1	Sup35pr-SIS1	S3C,S3D
DPY1368	w303a; HSEv2-Venus::LEU2; SSA1∆::HYG; SSA2∆::KAN; TEF1pr-SSA2::HIS; SSA4∆::NAT; TEF1pr-SSA2::URA; SSA3∆::BLE	∆FBL Hsp70	3C,3E,3F,S3C,5A, 5B
DPY1761	w303a; 4xHSE-Venus::LEU;Sup35pr-SIS1; Sup35pr-Sis1::Trp	2xsup35pr-Sis1	Fig 3C,3E,3F,S3C,S3D,5B,5A,S5
DPY1284	w303a; tpk1/2/3-as; TOR1-1(S1972I); fpr1∆::NAT; (TEF2pr-mKate-URA3-4xHSEve-EmGFP); RPL13A-2xFKBP12::TRP; SIS1-FRB::HIS	Sis1-AA	Fig 1E, 2B
DPY144	w303a; 4xHSE-Venus::LEU	WT	Fig S1, 2D,2F,3C,3E,3F,S3D,5B,S5
DPY1615	w303a; 4xHSE-Venus::LEU; Sis1-ERVB1-mscarlet::KAN	SIS1pr-SIS1-P2A-mscarlet	Fig S3A,B,D
DPY1661	w303a; 4xHSE-Venus::LEU; Sup35pr-Sis1-ERVB1-mscarlet::KAN	Sup35pr-SIS1-P2A-mscarlet	Fig S3A,B,D
DPY1600	w303a; 4xHSE-Venus::LEU; Hsp82-ERVB1-mscarlet::KAN	WT	Fig S1, S3C, 5A
DPY1930	w303a: Halo-Sis1; Nsr1-mscarlet-i::KAN	Sis1-Halo	4B, 4C
DPY1846	Sis1 mVenus:His, Nsr1-mScarI:Kan; ssa1pr-HALO-ssa1ORF::LEU	Ssa1-Halo	4B, 4D
DPY1990	w303a; Hsf1-mVenus::HIS; ssa1pr-HALO-ssa1ORF::LEU	Ssa1-Halo; Hsf1-mVenus	4E, 4F
DPY1991	w303a; 4xHSE-mVenus::HIS; Pab1-mKate::URA3	Pab1-mKate	5C
DPY1992	w303a; 4xHSE-Venus::LEU;Sup35pr-SIS1; Sup35pr-Sis1::Trp; Pab1-mKate::URA3	Pab1-mKate; 2xSup35pr-Sis1	5C
DPY2001	w303a; Halo-sis1 (N ter CRISPR); Hsf1-mVenus::HIS clone 1	Halo-Sis1; Hsf1-mVenus	4E, 4F
