# Supplementary figures and images for: Transcriptional regulation of Sis1 promotes fitness but not feedback in the heat shock response
Source: eLife journal article supplement (doi:10.7554/elife.79444), 2023-05-09

Figure 5 – figure supplement 1

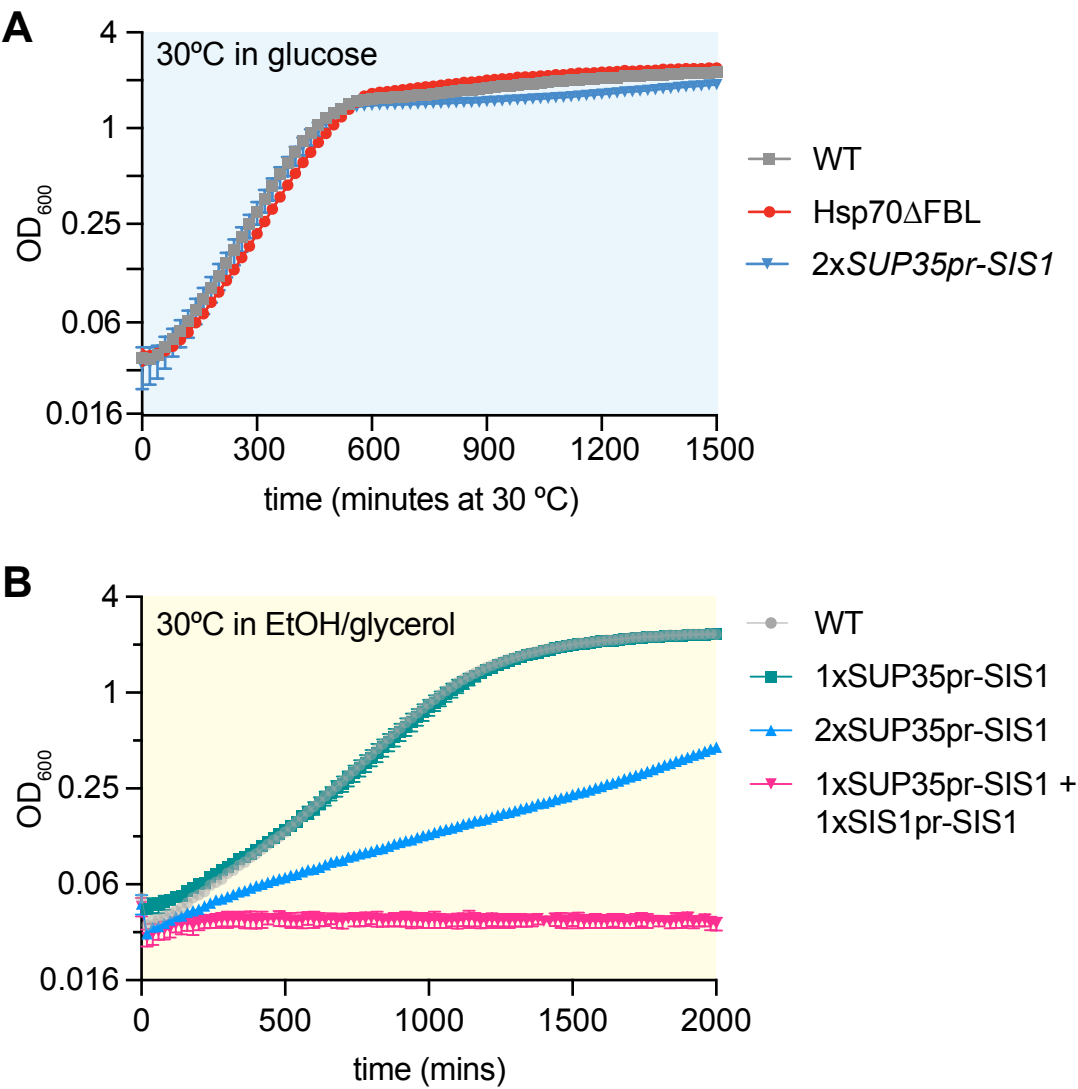

Supplement: supp [file elife-79444-supp-v1.zip]

Figure 1 – figure supplement 1

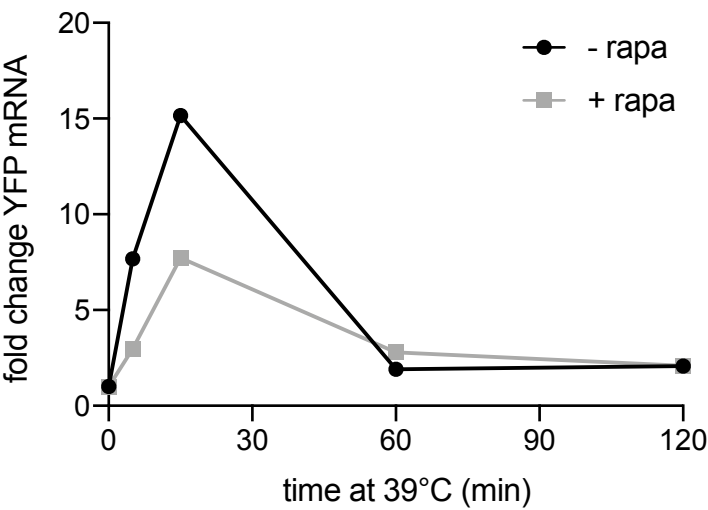

Supplement: supp [file elife-79444-supp-v1.zip]

**Figure 3 – figure supplement 1**

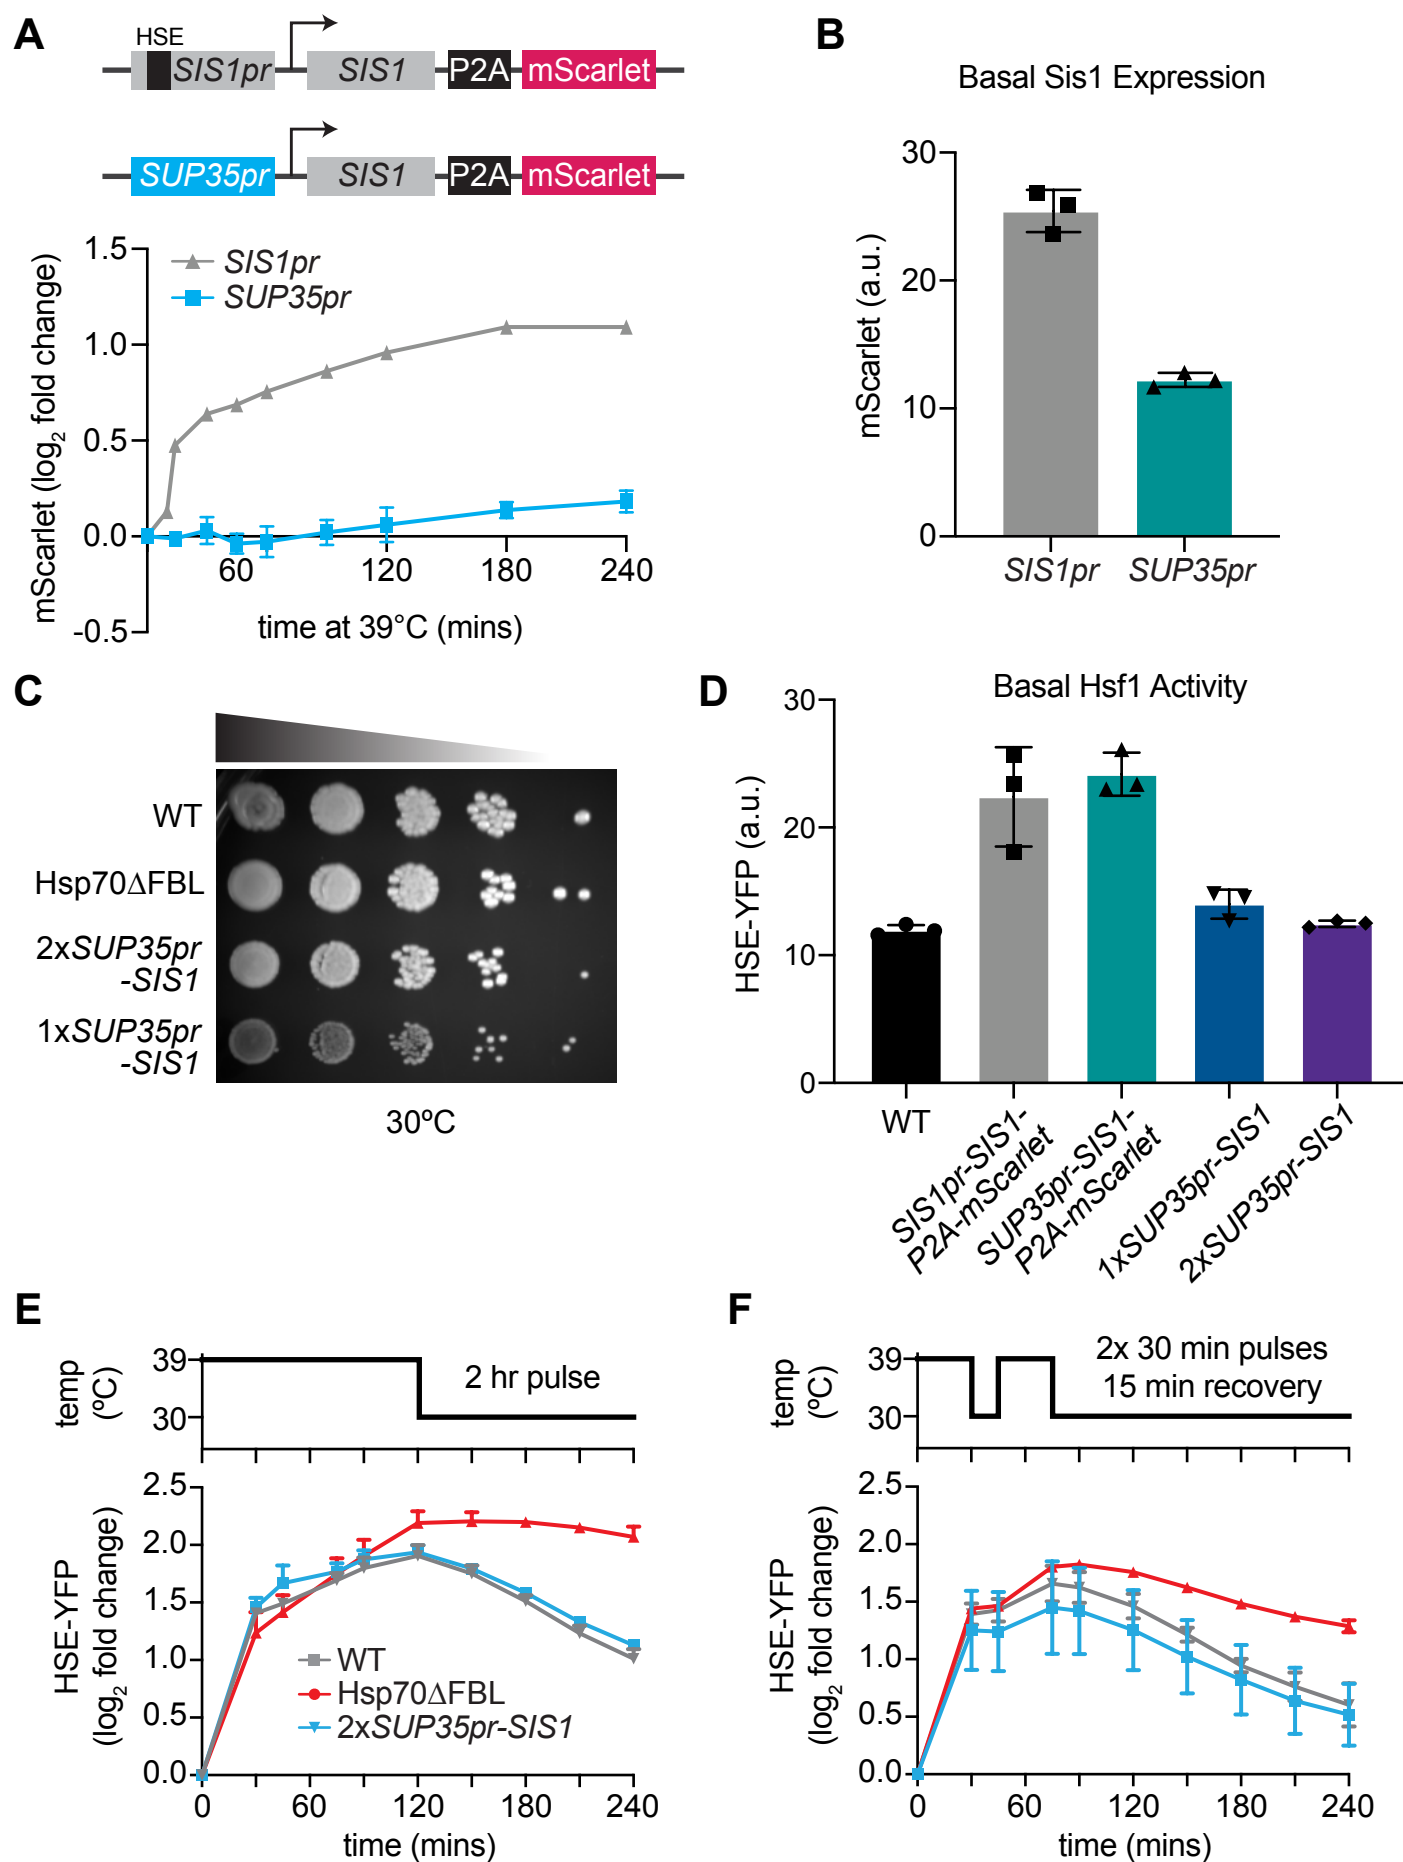

Supplement: supp [file elife-79444-supp-v1.zip]
